# Supplementary material for: Women’s Leadership in Climate Change Adaptation: Harnessing Experience, Overcoming Vulnerability
Source: Research Square preprint supplement (doi:10.21203/rs.3.rs-7331547/v1), 2025-11-22
Supplement: Supplementary file 2 [file e99b42d38e0dbb74a3aa35f0.pdf]

## **Verbal Consent**

"Namaste. I am a Master's scholar from the Indian Agricultural Research Institute, New Delhi. I have come here to conduct a study on women's leadership in climate change adaptation. The purpose of my research is to understand how women like you face the challenges of changing climate, what kind of strategies you use to protect your families, crops, and livestock, and how your leadership through Self-Help Groups and community work helps in reducing vulnerability. By learning from your experiences, this study will try to show how women's leadership can make villages stronger and more resilient to climate challenges.

Your participation in this study is very valuable. It will help me to understand not only the problems women face but also the strengths and solutions you are already practicing. The results of this study will be used to guide future programmes and policies so that women farmers get more recognition, resources, and support in climate adaptation. This is why your role in this research is so important.

I want to assure you that taking part in this study is completely voluntary. You may choose not to answer any question or even withdraw at any time without facing any difficulty. Whatever information you share will remain confidential. Your name will not appear in any report or publication, and the data will be used only for academic and research purposes. Please feel free to ask me any question if you have doubts or concerns. If you are comfortable and willing to take part, I request your consent to participate in the focus group discussions and survey".
